# Supplementary material for: New Antibacterial Secondary Metabolites from a Marine-Derived Talaromyces sp. Strain BTBU20213036
Source: MDPI journal article supplement (doi:10.3390/antibiotics11020222), 2022-02-10
Supplement: s1 [file s1]

## **SUPPLEMENTARY MATERIAL**

### **New antibacterial secondary metabolites from a marine-derived *Talaromyces* sp. strain BTBU20213036**

**Fuhang Song <sup>1</sup>, Yifei Dong <sup>1</sup>, Shangzhu Wei <sup>2</sup>, Xinwan Zhang <sup>2</sup>, Kai Zhang <sup>1</sup> and Xiuli Xu <sup>2,\*</sup>**

## Table of Contents

|                                                                                                        |    |
|--------------------------------------------------------------------------------------------------------|----|
| <b>Figure S1.</b> HRESIMS spectrum for <b>1</b> .....                                                  | 3  |
| <b>Figure S2.</b> HPLC profile and UV spectrum for <b>1</b> .....                                      | 3  |
| <b>Figure S3.</b> $^1\text{H}$ NMR spectrum (500 MHz, DMSO- $d_6$ ) of <b>1</b> .....                  | 4  |
| <b>Figure S4.</b> $^{13}\text{C}$ NMR spectrum (125 MHz, DMSO- $d_6$ ) of <b>1</b> .....               | 4  |
| <b>Figure S5.</b> HSQC spectrum (500 MHz, DMSO- $d_6$ ) of <b>1</b> .....                              | 5  |
| <b>Figure S6.</b> $^1\text{H}$ - $^1\text{H}$ COSY spectrum (500 MHz, DMSO- $d_6$ ) of <b>1</b> .....  | 5  |
| <b>Figure S7.</b> HMBC spectrum (500 MHz, DMSO- $d_6$ ) of <b>1</b> .....                              | 6  |
| <b>Figure S8.</b> ROESY spectrum (500 MHz, DMSO- $d_6$ ) of <b>1</b> .....                             | 6  |
| <b>Figure S9.</b> HRESIMS spectrum for <b>2</b> .....                                                  | 7  |
| <b>Figure S10.</b> HPLC profile and UV spectrum for <b>2</b> .....                                     | 7  |
| <b>Figure S11.</b> $^1\text{H}$ NMR spectrum (500 MHz, DMSO- $d_6$ ) of <b>2</b> .....                 | 8  |
| <b>Figure S12.</b> $^{13}\text{C}$ NMR spectrum (125 MHz, DMSO- $d_6$ ) of <b>2</b> .....              | 8  |
| <b>Figure S13.</b> HSQC spectrum (500 MHz, DMSO- $d_6$ ) of <b>2</b> .....                             | 9  |
| <b>Figure S14.</b> $^1\text{H}$ - $^1\text{H}$ COSY spectrum (500MHz, DMSO- $d_6$ ) of <b>2</b> .....  | 9  |
| <b>Figure S15.</b> HMBC spectrum (500MHz, DMSO) of <b>2</b> .....                                      | 10 |
| <b>Figure S16.</b> ROESY spectrum (500 MHz, DMSO- $d_6$ ) of <b>2</b> .....                            | 10 |
| <b>Figure S17.</b> HRESIMS spectrum for <b>3</b> .....                                                 | 11 |
| <b>Figure S18.</b> HPLC profile and UV spectrum for <b>3</b> .....                                     | 11 |
| <b>Figure S19.</b> $^1\text{H}$ NMR spectrum (500 MHz, DMSO- $d_6$ ) of <b>3</b> .....                 | 12 |
| <b>Figure S20.</b> $^{13}\text{C}$ NMR spectrum (125 MHz, DMSO- $d_6$ ) of <b>3</b> .....              | 12 |
| <b>Figure S21.</b> HSQC spectrum (500 MHz, DMSO- $d_6$ ) of <b>3</b> .....                             | 13 |
| <b>Figure S22.</b> $^1\text{H}$ - $^1\text{H}$ COSY spectrum (500 MHz, DMSO- $d_6$ ) of <b>3</b> ..... | 13 |
| <b>Figure S23.</b> HMBC spectrum (500 MHz, DMSO- $d_6$ ) of <b>3</b> .....                             | 14 |
| <b>Figure S24.</b> ROESY spectrum (500 MHz, DMSO- $d_6$ ) of <b>3</b> .....                            | 14 |
| <b>Figure S25.</b> Colony Morphology of strain BTBU20213036.....                                       | 15 |
| <b>Figure S26.</b> Neighbor-joining phylogenetic tree of strain BTBU20213036 .....                     | 16 |
| <b>Figure S27.</b> Flow chart of the fermentation, extraction and isolation .....                      | 17 |
| <b>Table S1.</b> 1D and 2D NMR data for <b>1</b> .....                                                 | 18 |
| <b>Table S2.</b> 1D and 2D NMR data for <b>2</b> .....                                                 | 19 |
| <b>Table S3.</b> 1D and 2D NMR data for <b>3</b> .....                                                 | 20 |

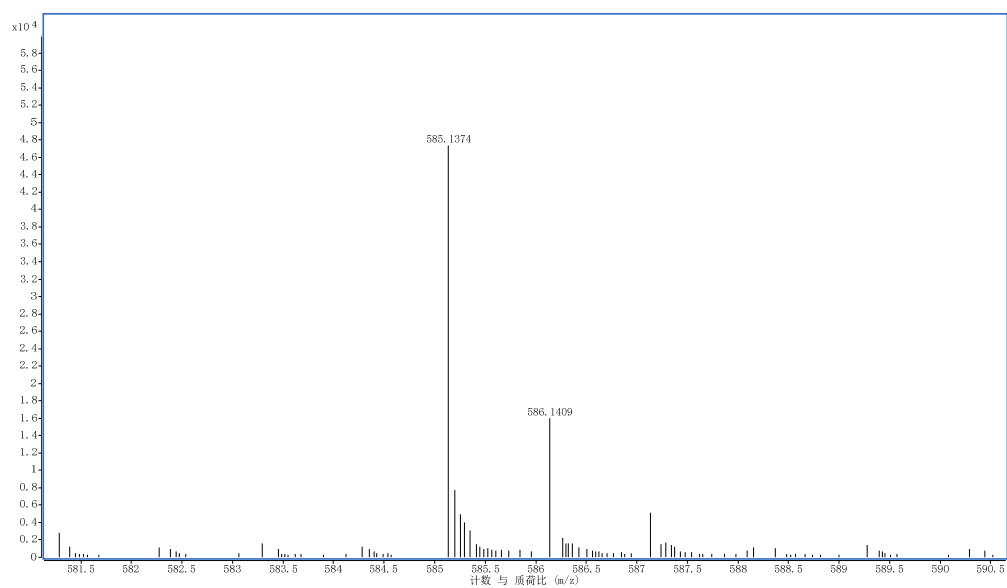

**Figure S1.** HRESIMS spectrum for **1**

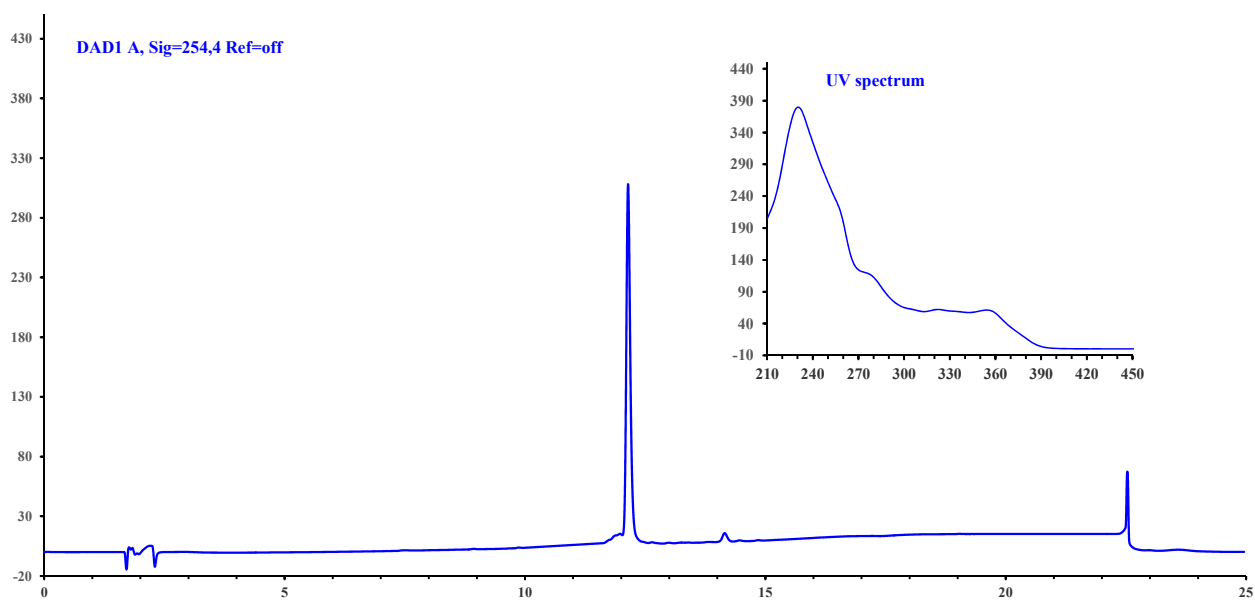

**Figure S2.** HPLC profile and UV spectrum for **1**

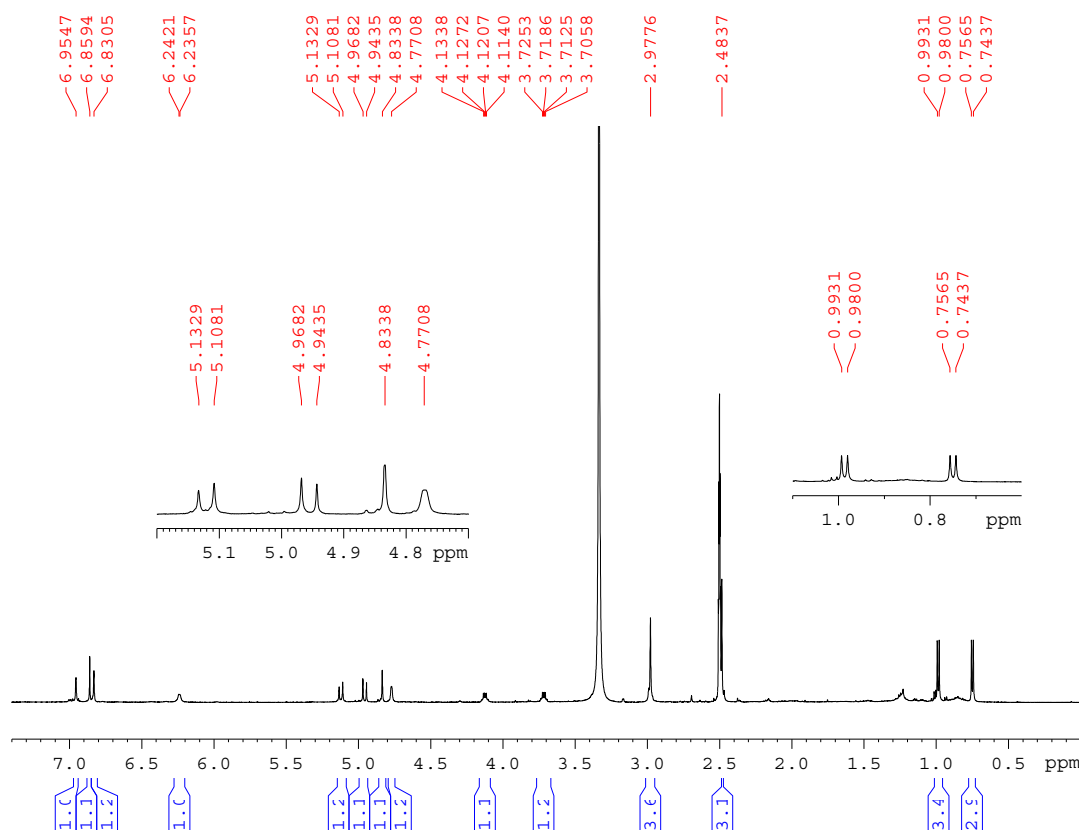Figure S3. <sup>1</sup>H NMR spectrum (500 MHz, DMSO-*d*<sub>6</sub>) of **1**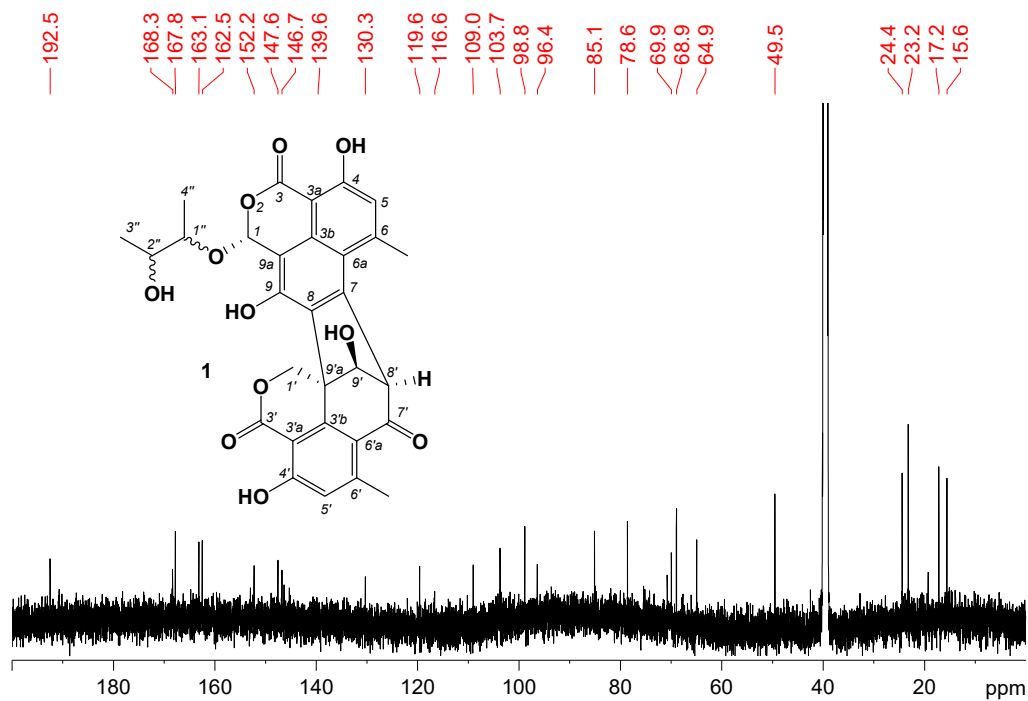Figure S4. <sup>13</sup>C NMR spectrum (125 MHz, DMSO-*d*<sub>6</sub>) of **1**

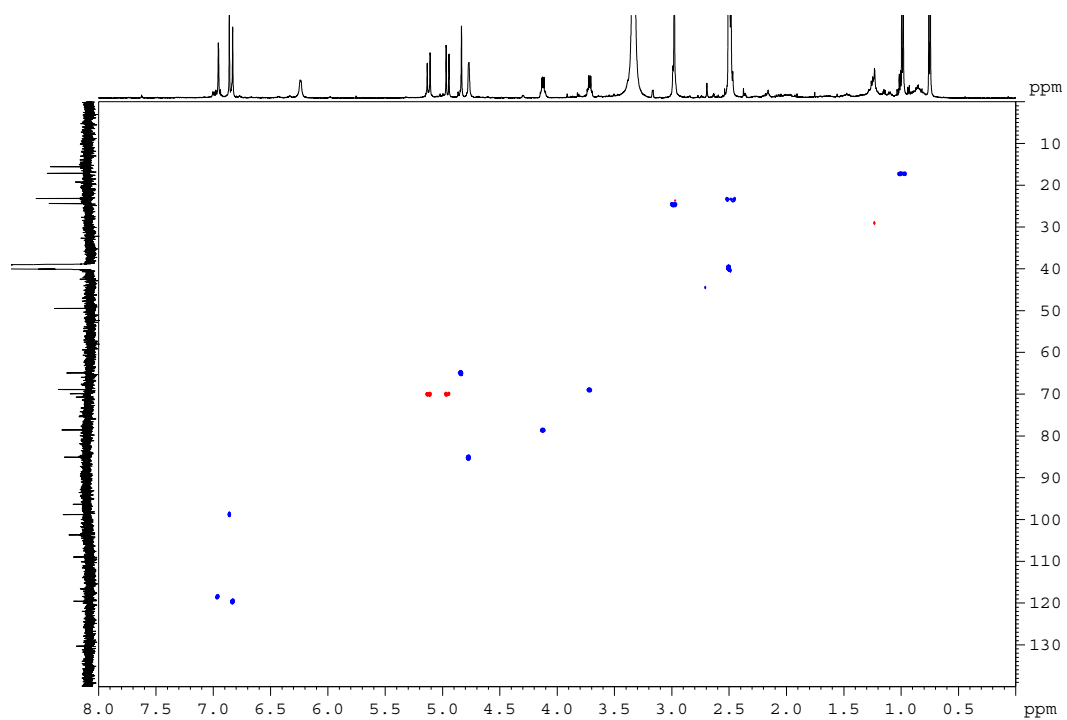

**Figure S5.** HSQC spectrum (500 MHz, DMSO- $d_6$ ) of **1**

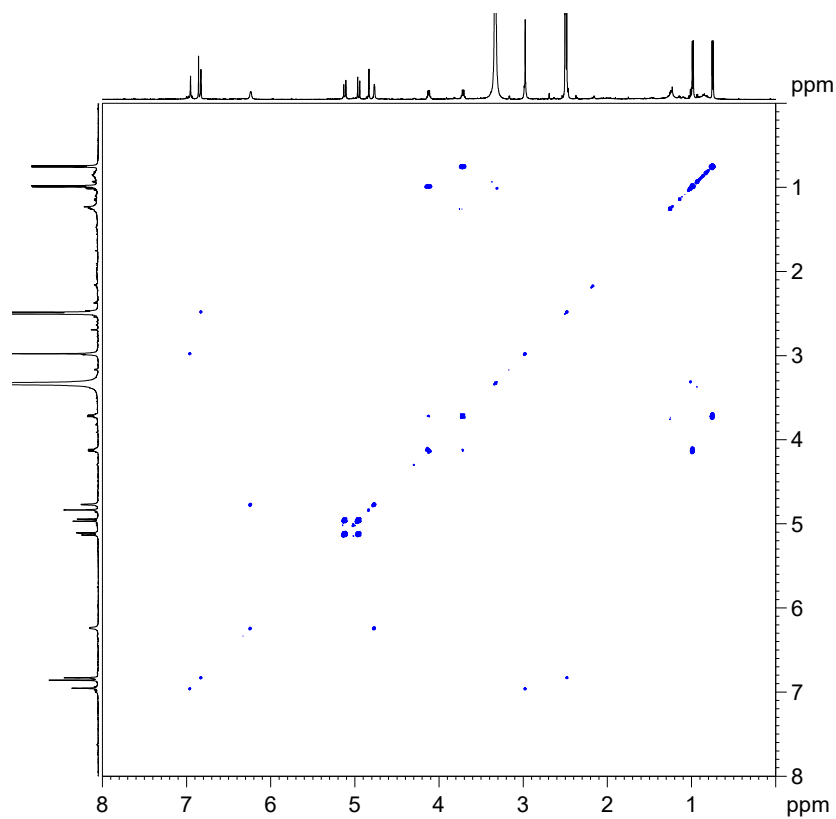

**Figure S6.**  $^1\text{H}$  -  $^1\text{H}$  COSY spectrum (500MHz, DMSO- $d_6$ ) of **1**

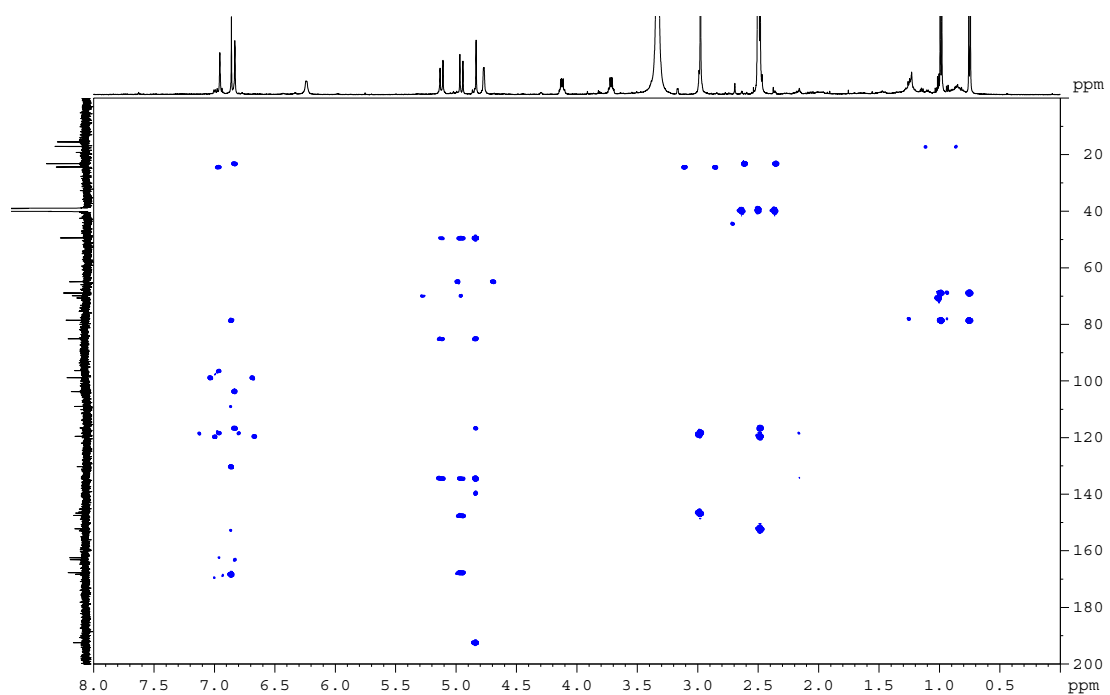

**Figure S7.** HMBC spectrum (500 MHz, DMSO-*d*<sub>6</sub>) of **1**

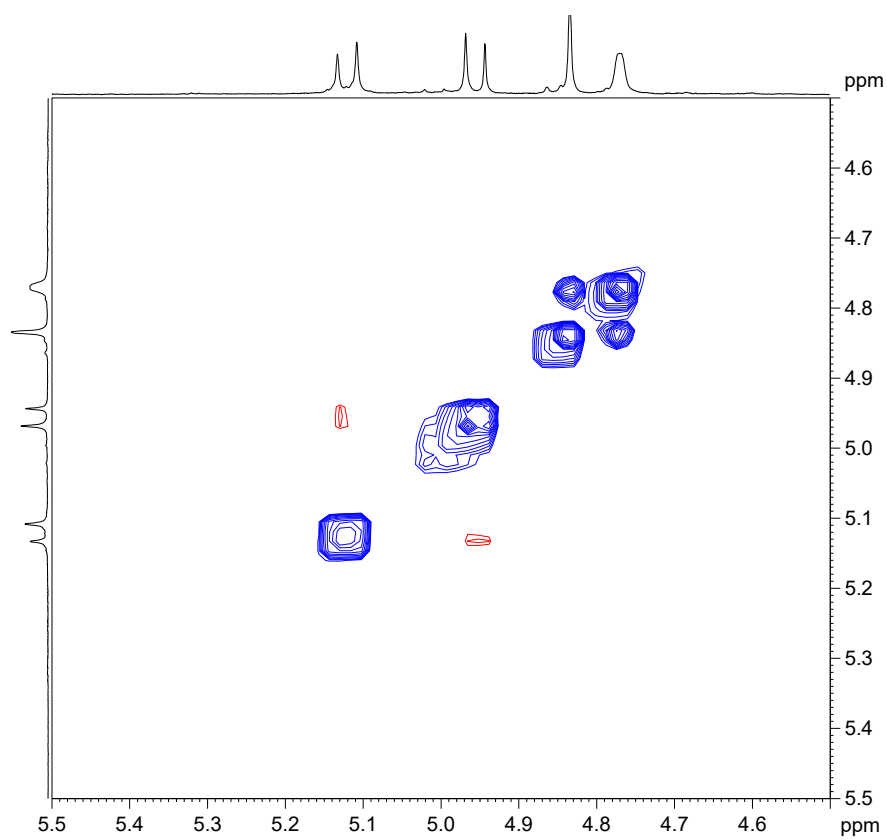

**Figure S8.** ROESY spectrum (500 MHz, DMSO-*d*<sub>6</sub>) of **1**

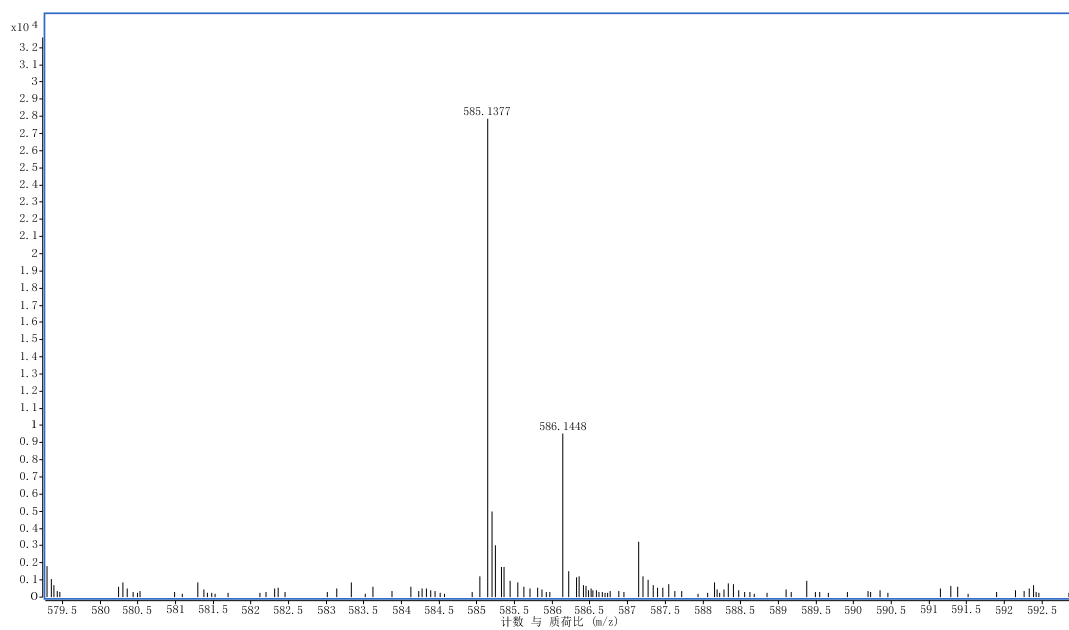

**Figure S9.** HRESIMS spectrum for **2**

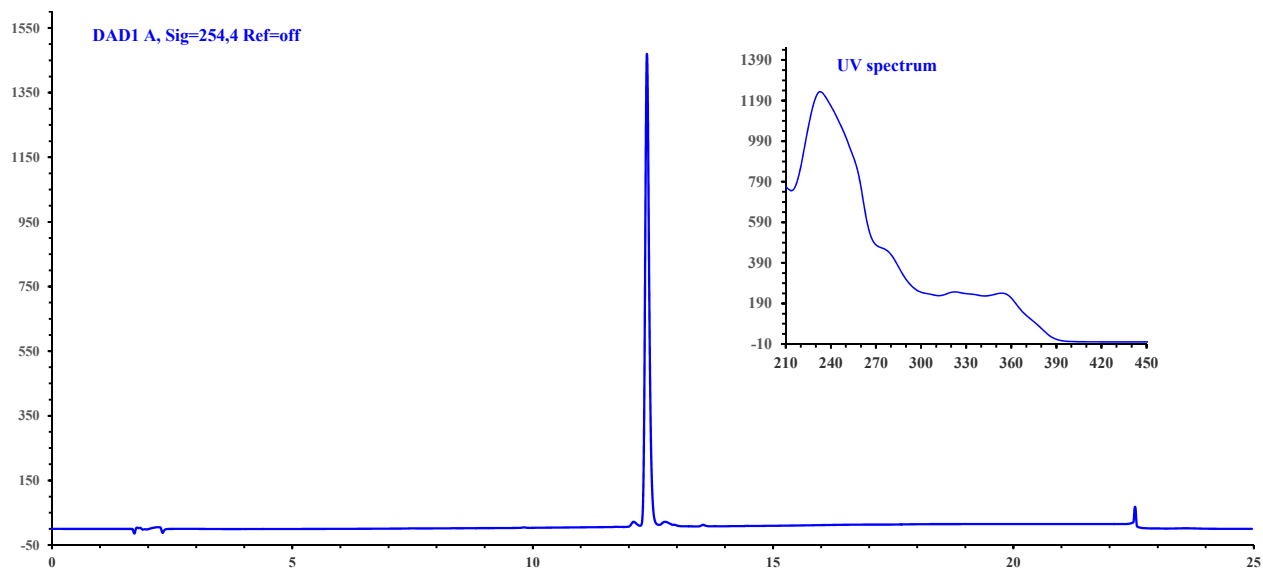

**Figure S10.** HPLC profile and UV spectrum for **2**

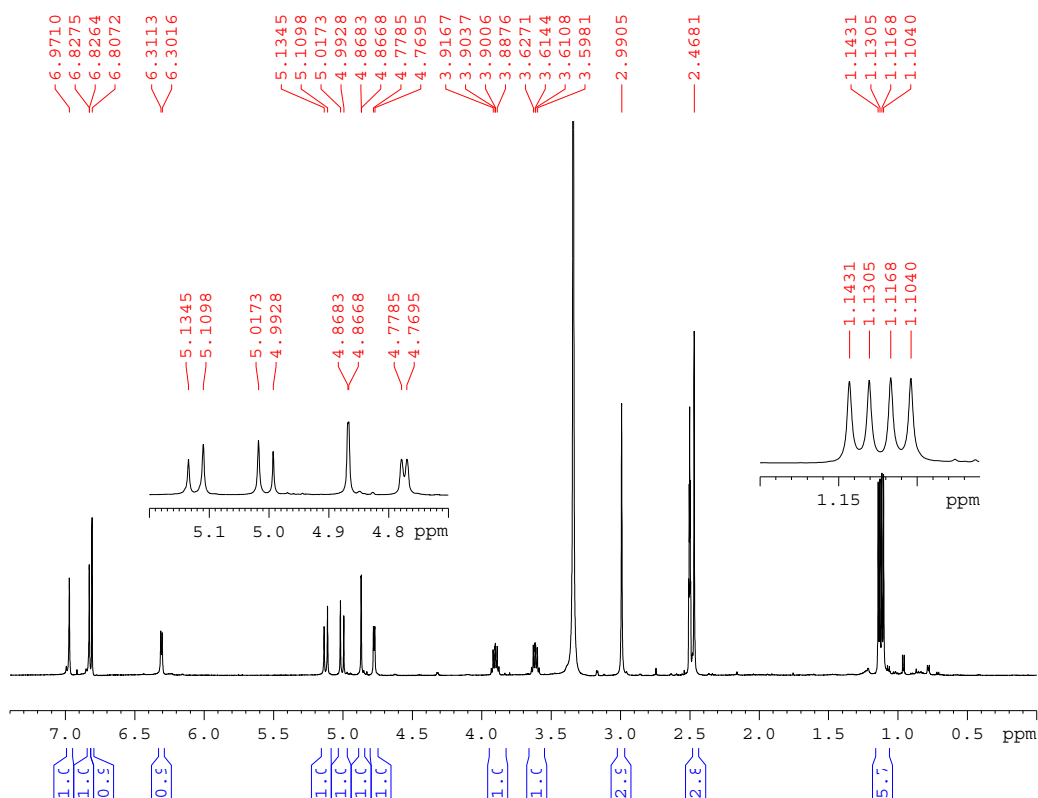Figure S11. <sup>1</sup>H NMR spectrum (500 MHz, DMSO-*d*<sub>6</sub>) of **2**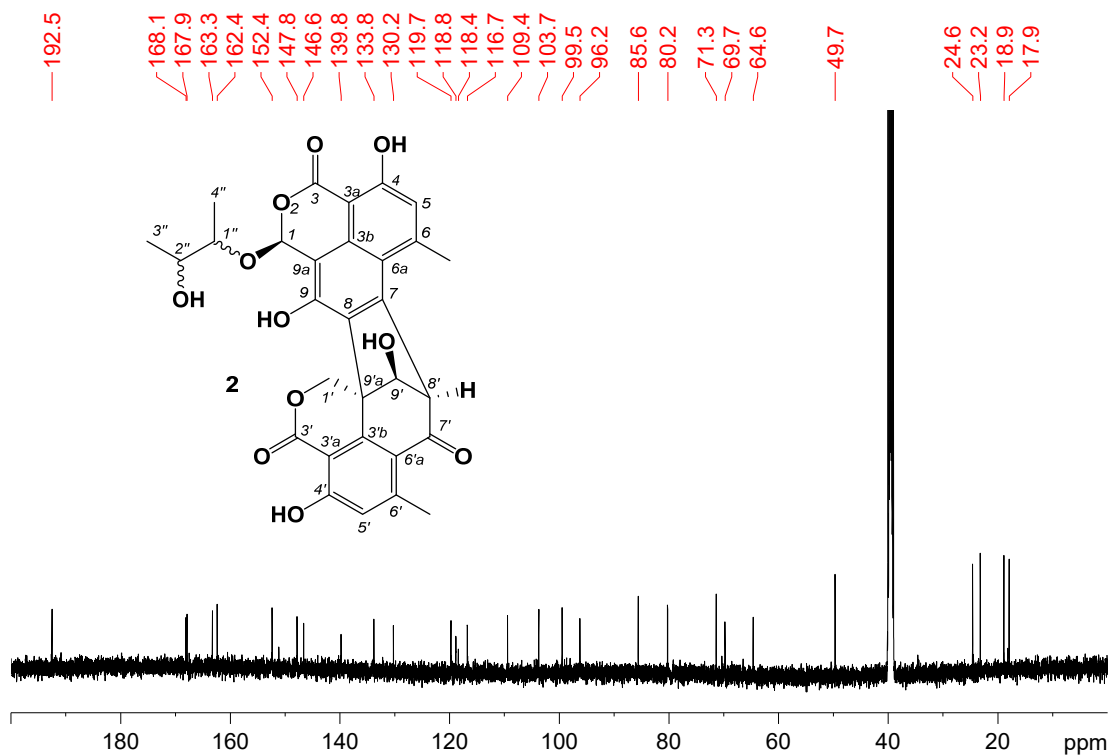Figure S12. <sup>13</sup>C NMR spectrum (125 MHz, DMSO-*d*<sub>6</sub>) of **2**



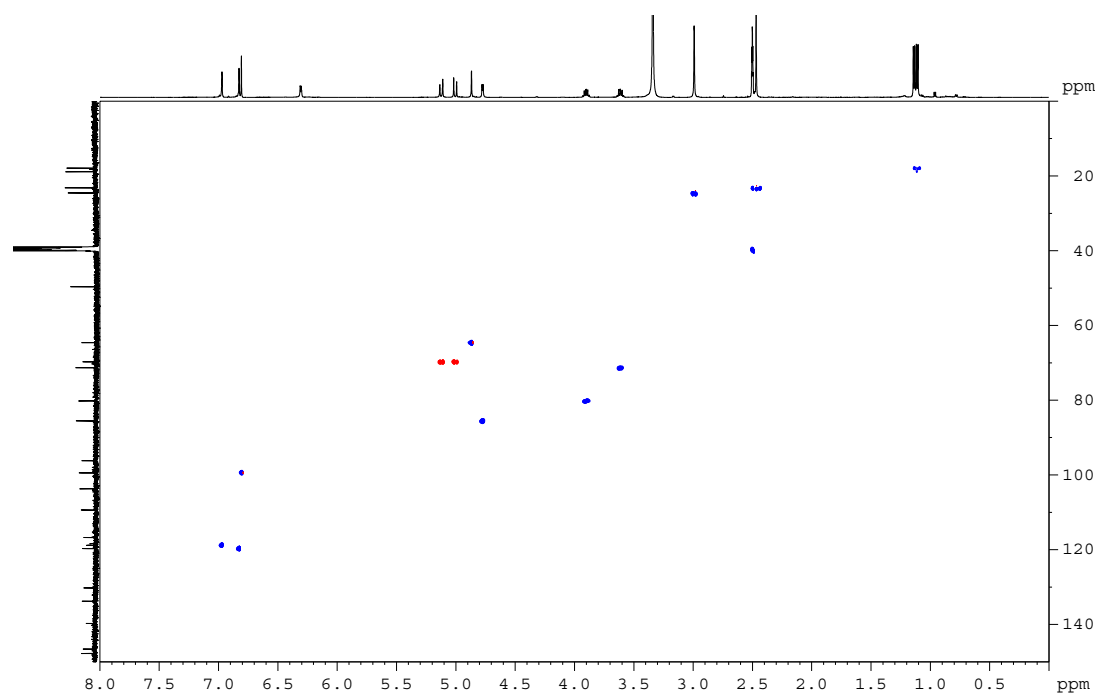

**Figure S13.** HSQC spectrum (500 MHz, DMSO-*d*<sub>6</sub>) of **2**

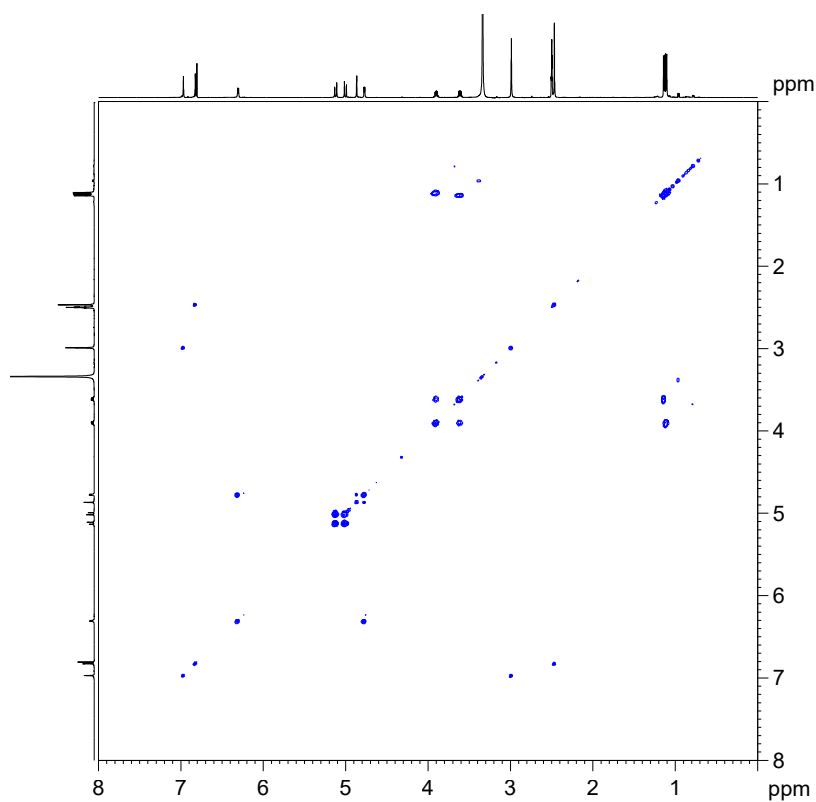

**Figure S14.**  $^1\text{H}$ - $^1\text{H}$  COSY spectrum (500 MHz, DMSO-*d*<sub>6</sub>) of **2**

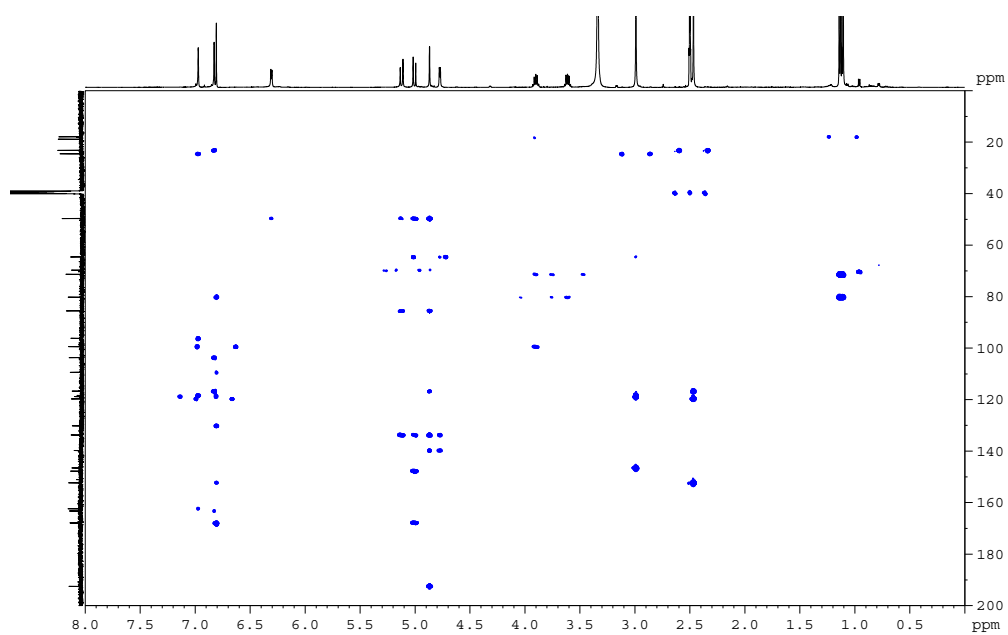

**Figure S15.** HMBC spectrum (500 MHz, DMSO- $d_6$ ) of **2**

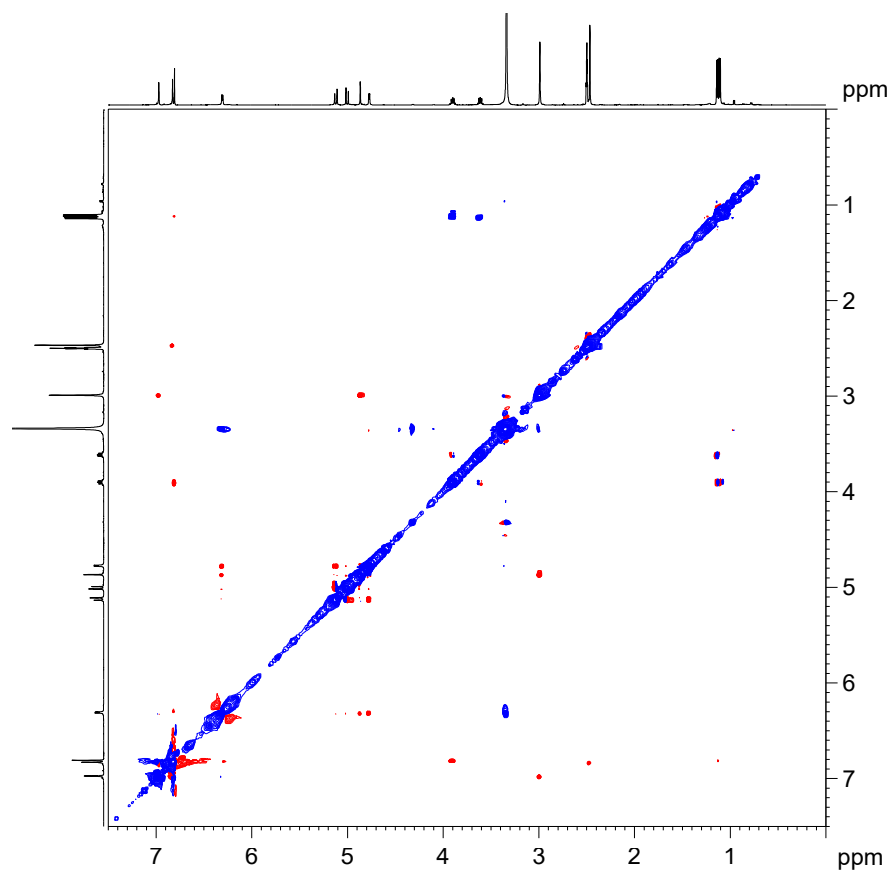

**Figure S16.** ROESY spectrum (500 MHz, DMSO- $d_6$ ) of **2**

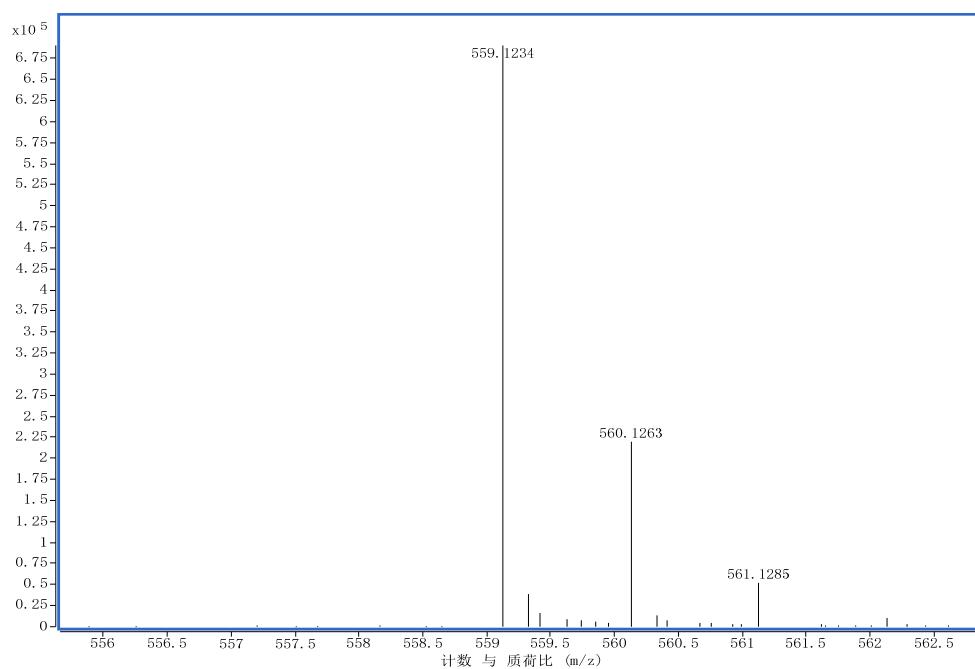

**Figure S17.** HRESIMS spectrum for **3**

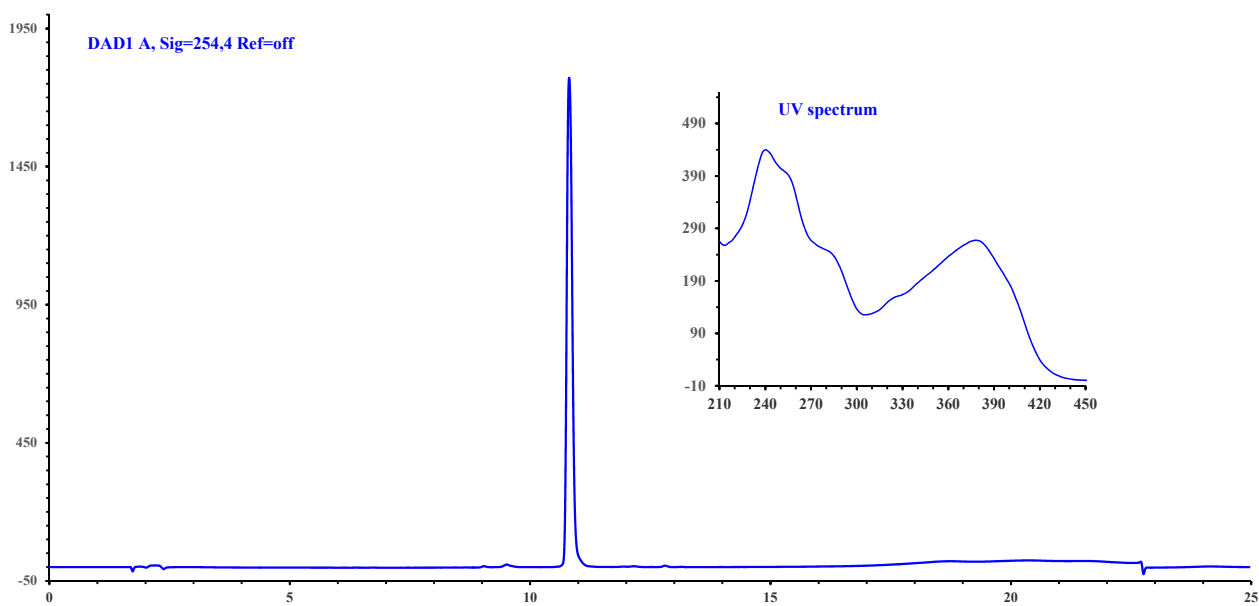

**Figure S18.** HPLC profile and UV spectrum for **3**

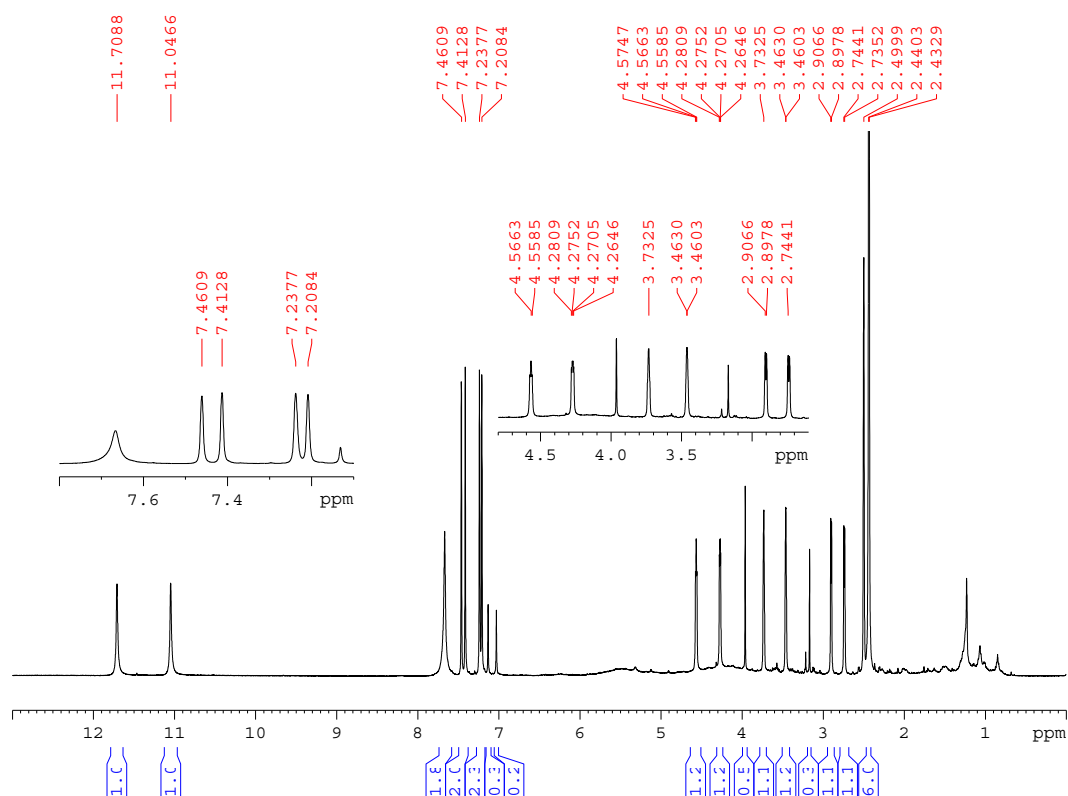Figure S19.  $^1\text{H}$  NMR spectrum (500 MHz,  $\text{DMSO}-d_6$ ) of **3**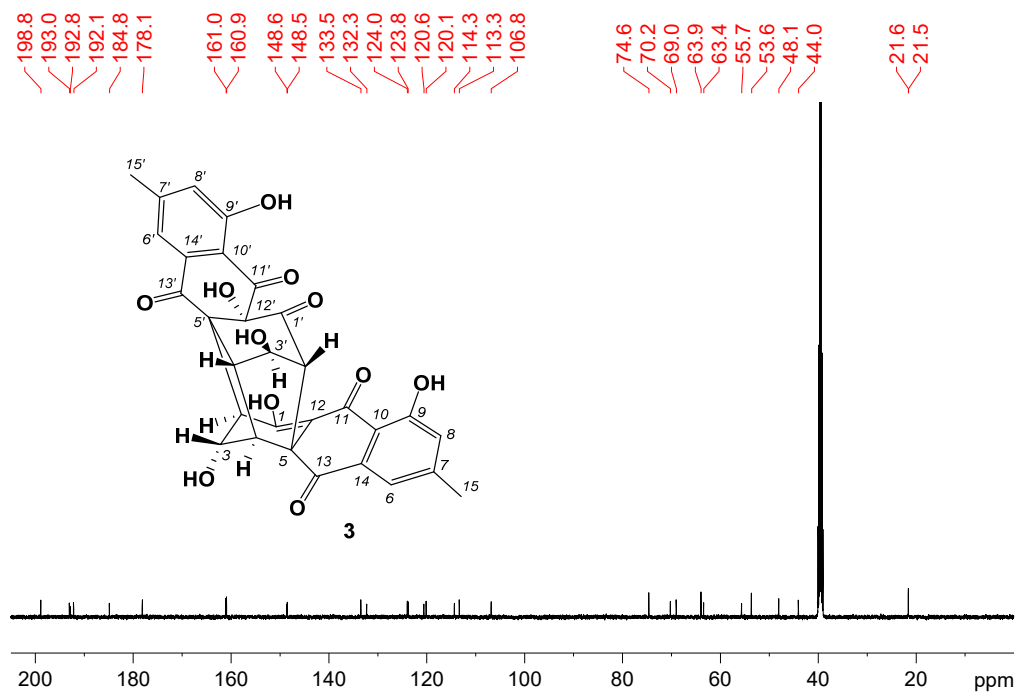Figure S20  $^{13}\text{C}$  NMR spectrum (125 MHz,  $\text{DMSO}-d_6$ ) of **3**

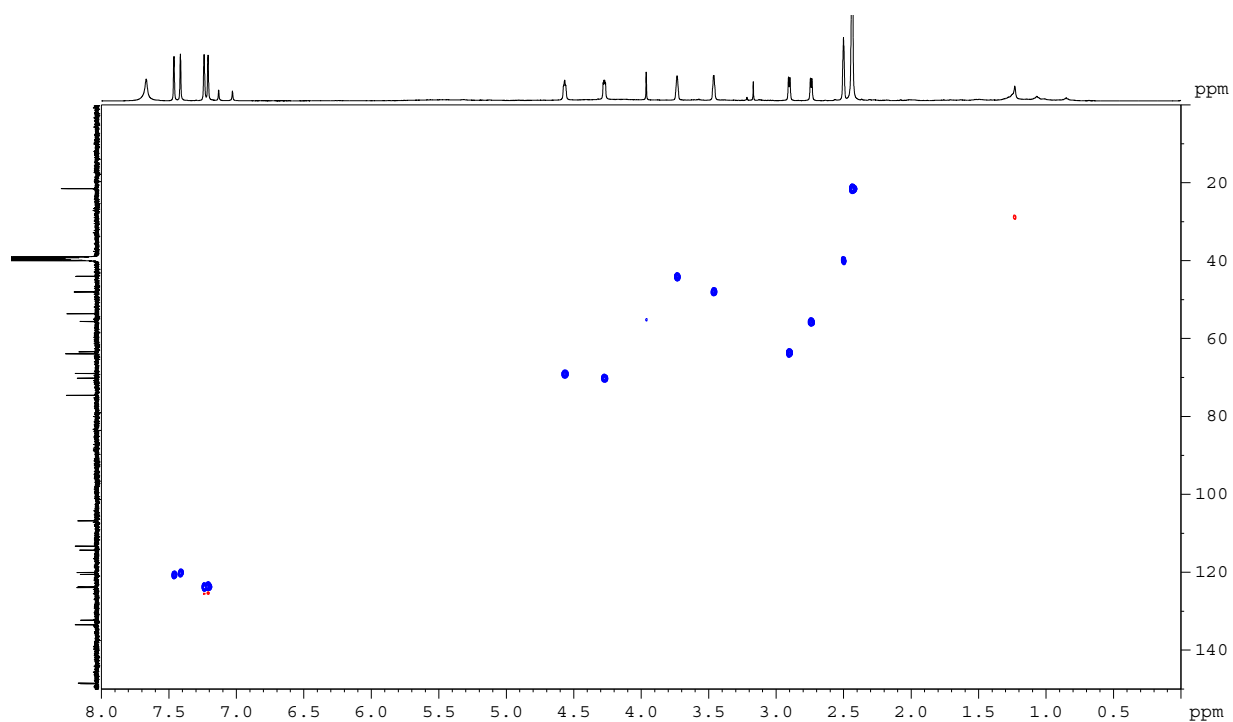

**Figure S21.** HSQC spectrum (500 MHz, DMSO- $d_6$ ) of **3**

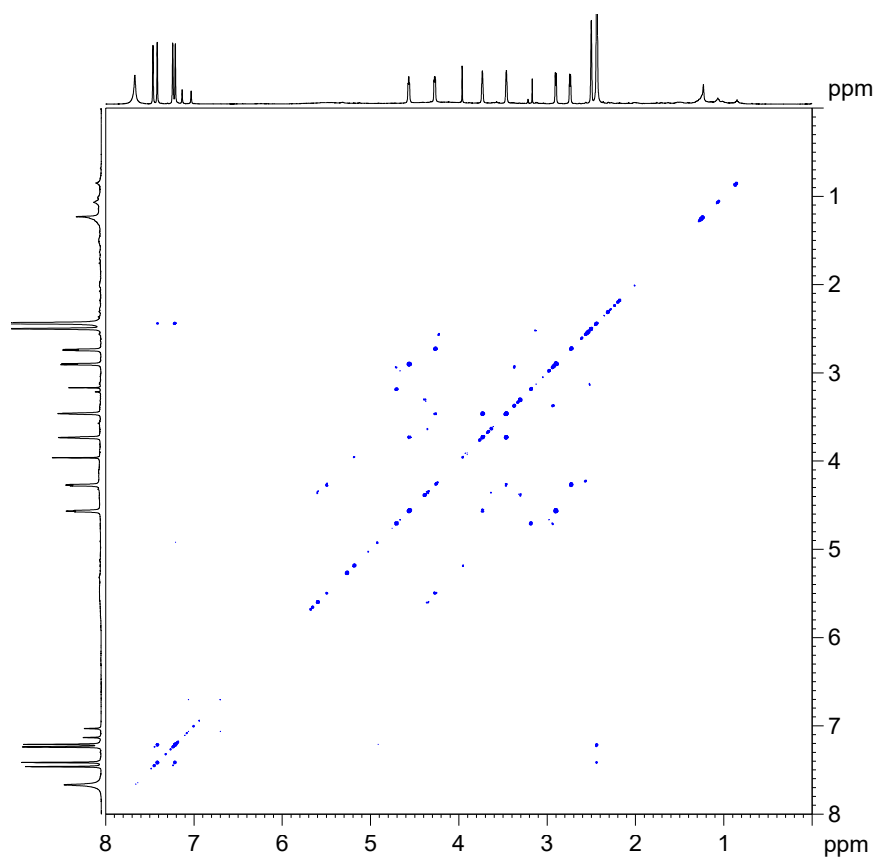

**Figure S22.**  $^1\text{H}$ - $^1\text{H}$  COSY spectrum (500 MHz, DMSO- $d_6$ ) of **3**

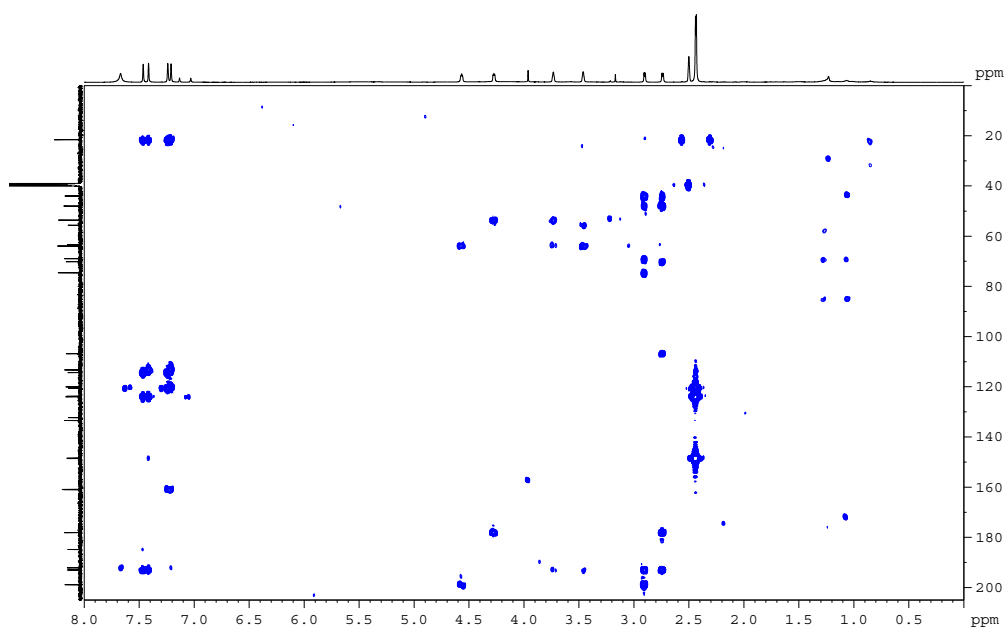

**Figure S23.** HMBC spectrum (500 MHz, DMSO- $d_6$ ) of **3**

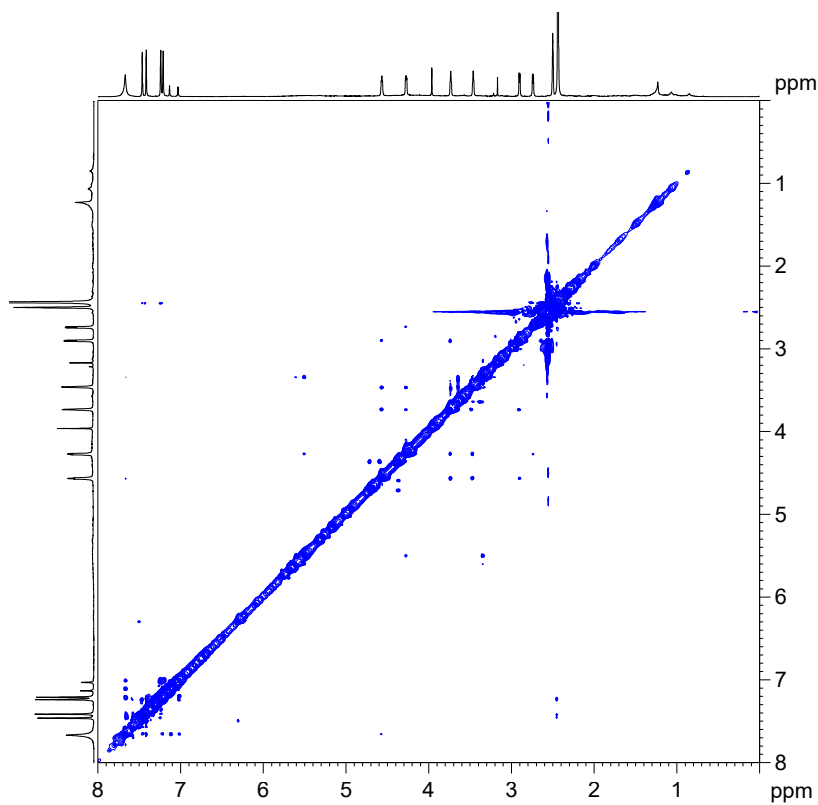

**Figure S24.** ROESY spectrum (500 MHz, DMSO- $d_6$ ) of **3**

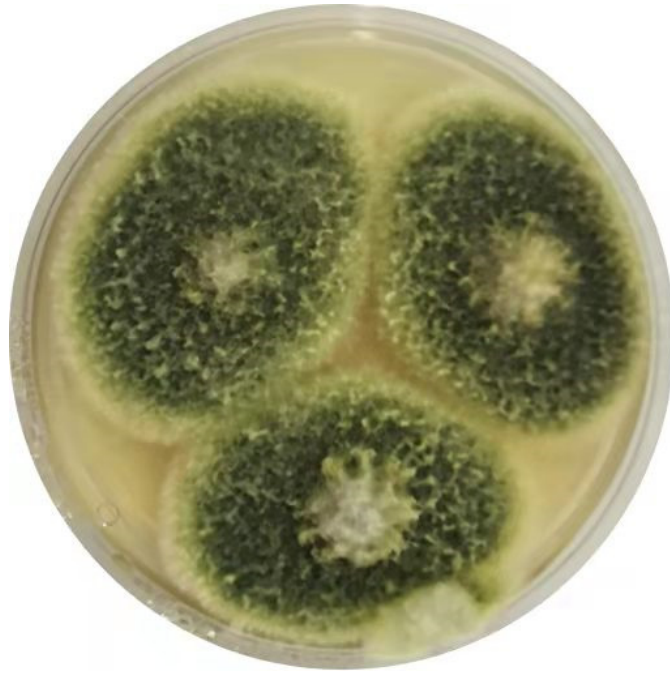

**Figure S25.** Colony Morphology of strain BTBU20213036

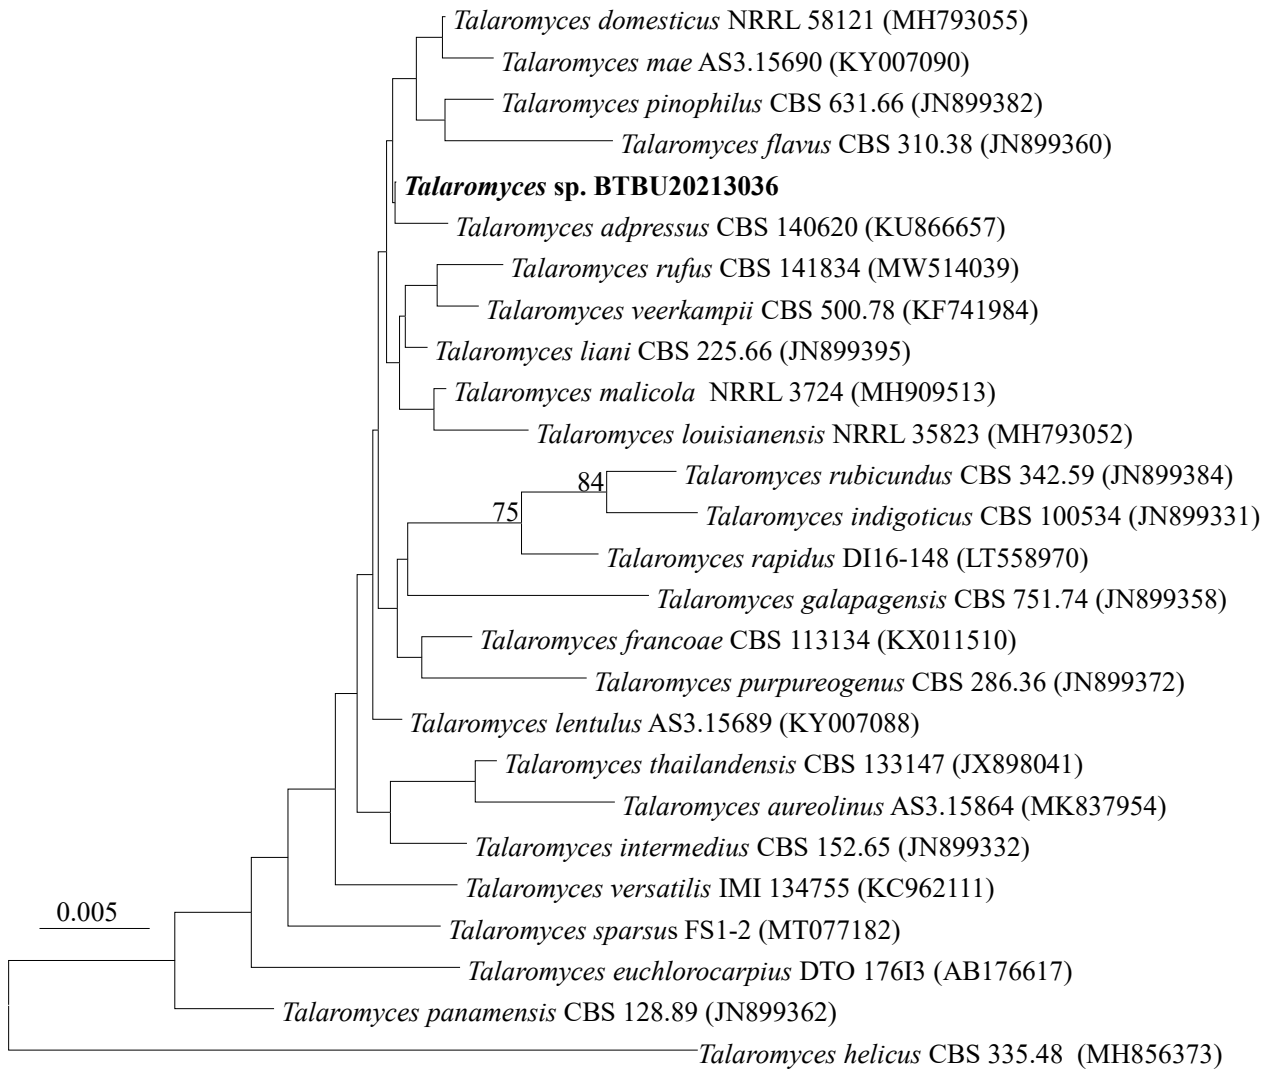

**Figure S26.** The Neighbor-joining phylogram inferred from the ITS sequences. Percentages over 70% derived from 1000 replicates are indicated at the nodes, the strain in this study is indicated in boldface. — Bar = 0.005 substitutions per nucleotide position.



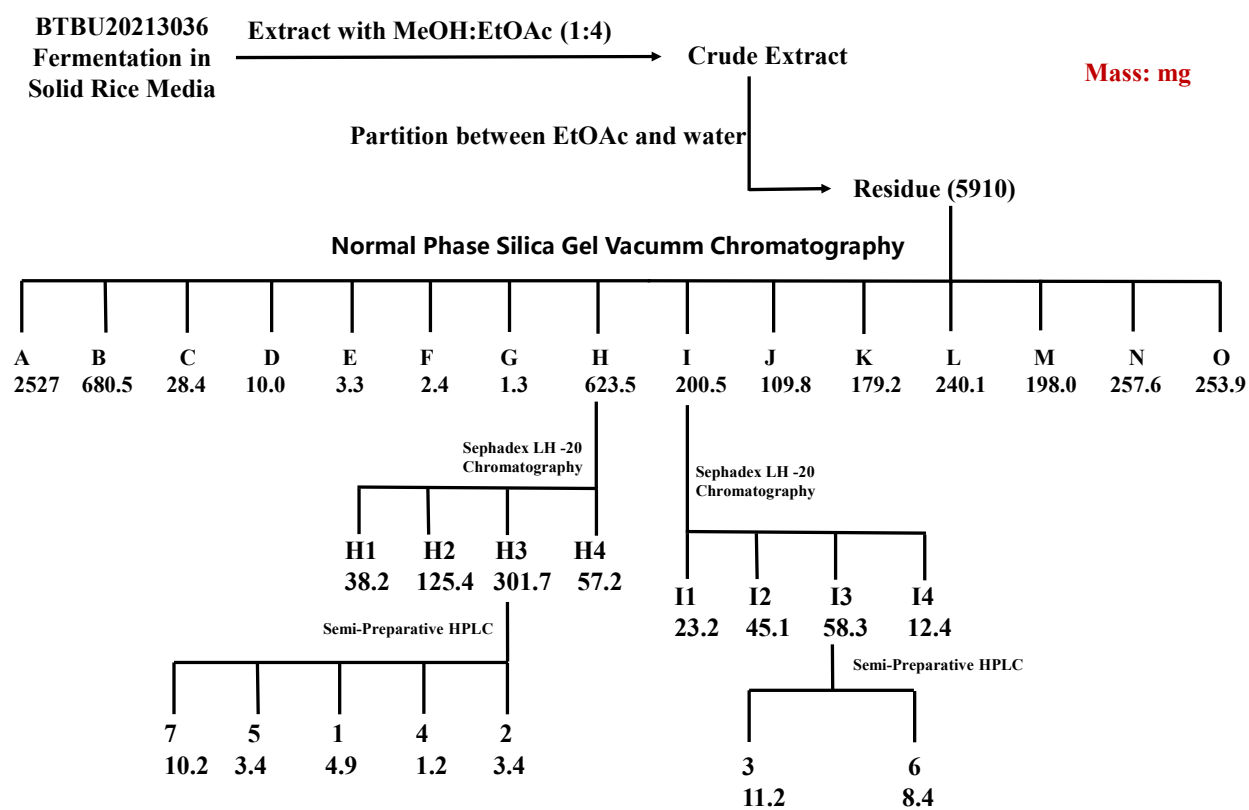

**Figure S27.** Flow chart of the fermentation, extraction and isolation

**Table S1.**  $^1\text{H}$  (500 MHz),  $^{13}\text{C}$  NMR (125 MHz), HMBC and ROESY correlations of **1** (in DMSO).

| Position | $\delta_{\text{C}}$ | $\delta_{\text{H}}$ (J in Hz)    | HMBC (H $\rightarrow$ C)      | ROESY    |
|----------|---------------------|----------------------------------|-------------------------------|----------|
| 1        | 98.8                | 6.86, s                          | 3, 3b, 9, 9a, 1"              |          |
| 3        | 168.3               |                                  |                               |          |
| 3a       | 96.4                |                                  |                               |          |
| 3b       | 130.3               |                                  |                               |          |
| 4        | 162.5               |                                  |                               |          |
| 5        | 118.4               | 6.96, s                          | 3a, 4, 5, Me-6                |          |
| 6        | 146.7               |                                  |                               |          |
| 6a       | 118.4               |                                  |                               |          |
| 7        | 139.6               |                                  |                               |          |
| 8        | 134.3               |                                  |                               |          |
| 9        | 152.2               | 5.12, d (12.0)<br>4.95, d (12.0) | 8, 9', 9'a<br>8, 3', 3'b, 9'a |          |
| 9a       | 109.0               |                                  |                               |          |
| 1'       | 69.9                |                                  |                               |          |
| 3'       | 167.8               |                                  |                               |          |
| 3'a      | 103.7               |                                  |                               |          |
| 3'b      | 147.6               | 6.83, s                          | 3'a, 4', 6'a, Me-6'           |          |
| 4'       | 163.1               |                                  |                               |          |
| 5'       | 119.6               |                                  |                               |          |
| 6'       | 152.2               |                                  |                               |          |
| 6'a      | 116.6               |                                  |                               |          |
| 7'       | 192.5               | 4.83, s<br>4.77, br s            | 7, 8, 6'a, 7', 9', 9'a        | 9'<br>8' |
| 8'       | 64.9                |                                  |                               |          |
| 9'       | 85.1                |                                  |                               |          |
| 9'a      | 49.5                |                                  |                               |          |
| Me-6     | 24.4                | 2.98, s                          | 5, 6, 6a                      |          |
| Me-6'    | 23.2                | 2.48, s                          | 5', 6', 6'a                   |          |
| 1"       | 78.6                | 4.12, m                          | 1                             |          |
| 2"       | 68.9                | 3.72, m                          |                               |          |
| 3"       | 15.6                | 0.75, d (6.5)                    | 1", 2"                        |          |
| 4"       | 17.2                | 0.99, d (6.5)                    | 1", 2"                        |          |
| OH-9'    |                     | 6.24, d (3.0)                    |                               |          |

**Table S2.**  $^1\text{H}$  (500 MHz),  $^{13}\text{C}$  NMR (125 MHz), HMBC and ROESY correlations of **2** (in DMSO).

| Position | $\delta_{\text{C}}$ | $\delta_{\text{H}}$ (J in Hz)                                         | HMBC (H $\rightarrow$ C)                               | ROESY        |
|----------|---------------------|-----------------------------------------------------------------------|--------------------------------------------------------|--------------|
| 1        | 99.5                | 6.81, s                                                               | 3, 3b, 9, 9a, 1''                                      |              |
| 3        | 168.1               |                                                                       |                                                        |              |
| 3a       | 96.2                |                                                                       |                                                        |              |
| 3b       | 130.2               |                                                                       |                                                        |              |
| 4        | 162.4               |                                                                       |                                                        |              |
| 5        | 118.8               | 6.97, s                                                               | 3a, 4, 6a, Me-6                                        |              |
| 6        | 146.6               |                                                                       |                                                        |              |
| 6a       | 118.4               |                                                                       |                                                        |              |
| 7        | 139.8               |                                                                       |                                                        |              |
| 8        | 133.8               |                                                                       |                                                        |              |
| 9        | 152.4               | 5.12, d (12.0)<br>5.00, d (12.0)                                      | 8, 9', 9'a<br>8, 3', 3'b, 9'a                          | 9'           |
| 9a       | 109.4               |                                                                       |                                                        |              |
| 1'       | 69.7                |                                                                       |                                                        |              |
| 3'       | 167.9               |                                                                       |                                                        |              |
| 3'a      | 103.7               |                                                                       |                                                        |              |
| 3'b      | 147.8               | 6.83, s                                                               | 3'a, 4', 6', Me-6'                                     |              |
| 4'       | 163.3               |                                                                       |                                                        |              |
| 5'       | 119.7               |                                                                       |                                                        |              |
| 6'       | 152.4               |                                                                       |                                                        |              |
| 6'a      | 116.7               |                                                                       |                                                        |              |
| 7'       | 192.5               | 4.87, d (1.0)<br>4.78, d (5.0)                                        | 7, 8, 6'a, 7', 9', 9'a<br>7, 8                         | OH-9'<br>1'a |
| 8'       | 64.6                |                                                                       |                                                        |              |
| 9'       | 85.6                |                                                                       |                                                        |              |
| 9'a      | 49.7                |                                                                       |                                                        |              |
| Me-6     | 24.6                |                                                                       |                                                        |              |
| Me-6'    | 23.2                | 3.90, m<br>3.61, m<br>1.14, d (6.5)<br>1.11, d (6.5)<br>6.31, d (3.0) | 5, 6, 6a<br>5', 6', 6'a<br>1'', 2''<br>1'', 2''<br>9'a |              |
| 1''      | 80.2                |                                                                       |                                                        |              |
| 2''      | 71.3                |                                                                       |                                                        |              |
| 3''      | 18.9                |                                                                       |                                                        |              |
| 4''      | 17.9                |                                                                       |                                                        |              |
| OH-9'    |                     |                                                                       |                                                        | 8'           |

**Table S3.**  $^1\text{H}$  (500 MHz),  $^{13}\text{C}$  NMR (125 MHz), HMBC and ROESY correlations of **3** (in DMSO).

| Position | $\delta_{\text{C}}$ | $\delta_{\text{H}}$ ( <i>J</i> in Hz) | HMBC (H→C)             | ROESY     |
|----------|---------------------|---------------------------------------|------------------------|-----------|
| 1        | 178.1               |                                       |                        |           |
| 2        | 55.7                | 2.73, d (5.0)                         | 1, 3, 4, 4', 13'       | 3         |
| 3        | 70.2                | 4.27, dd (5.0, 3.0)                   | 1, 5                   | 2, 4'     |
| 4        | 48.1                | 3.46, brs                             | 5, 2'                  | 3'        |
| 5        | 53.6                |                                       |                        |           |
| 6        | 120.6               | 7.46, s                               | 8, 10, 13, 15          |           |
| 7        | 148.5               |                                       |                        |           |
| 8        | 124.0               | 7.24, s                               | 6, 9, 10, 15           |           |
| 9        | 160.9               |                                       |                        |           |
| 10       | 114.3               |                                       |                        |           |
| 11       | 184.8               |                                       |                        |           |
| 12       | 106.8               |                                       |                        |           |
| 13       | 193.0               |                                       |                        |           |
| 14       | 132.3               |                                       |                        |           |
| 15       | 21.6                | 2.44, s                               | 6, 7, 8                |           |
| 9-OH     |                     | 11.71, s                              |                        |           |
| 1'       | 198.8               |                                       |                        |           |
| 2'       | 63.4                | 2.90, d (4.5)                         | 4, 13, 1', 3', 4', 12' | 3'        |
| 3'       | 69.0                | 4.56, dd (4.5, 4.0)                   | 1', 5'                 | 4, 2', 4' |
| 4'       | 44.0                | 3.73, brs                             | 5                      | 3, 3'     |
| 5'       | 63.9                |                                       |                        |           |
| 6'       | 120.1               | 7.41, s                               | 8', 10', 13', 15'      |           |
| 7'       | 148.6               |                                       |                        |           |
| 8'       | 123.8               | 7.21, s                               | 6', 9', 10', 15'       |           |
| 9'       | 161.0               |                                       |                        |           |
| 10'      | 113.3               |                                       |                        |           |
| 11'      | 192.1               |                                       |                        |           |
| 12'      | 74.6                |                                       |                        |           |
| 13'      | 192.8               |                                       |                        |           |
| 14'      | 133.5               |                                       |                        |           |
| 15'      | 21.5                | 2.43, s                               | 6', 7', 8'             |           |
| 9-OH'    |                     | 11.04, s                              |                        |           |
